# Supplementary material for: Scaffold-directed growth of metal halide perovskite hopper crystals
Source: Royal Society of Chemistry journal article supplement (doi:10.1039/d3ce01153d), 2024-01-01
Supplement: d3ce01153d1.pdf [file d3ce01153d1.pdf]

Electronic Supplementary Material (ESI) for CrystEngComm.

This journal is © The Royal Society of Chemistry 2023

## Supporting Information

### Scaffold-Directed Growth of Metal Halide Perovskite Hopper Crystals

*Qintian Zhou,<sup>a</sup> Min-Woo Kim,<sup>a</sup> Yuze Zhang,<sup>b</sup> Aida Alaei,<sup>a</sup> Alexander G. Shtukenberg,<sup>a</sup> Dilhan M. Kalyon,<sup>b</sup> and  
Stephanie S. Lee<sup>a,\*</sup>*

<sup>a</sup>Molecular Design Institute, Department of Chemistry, New York University, New York, NY, USA

Email: [stephlee@nyu.edu](mailto:stephlee@nyu.edu)

<sup>b</sup>Department of Chemical Engineering and Materials Science, Stevens Institute of Technology, Hoboken, NJ, USA

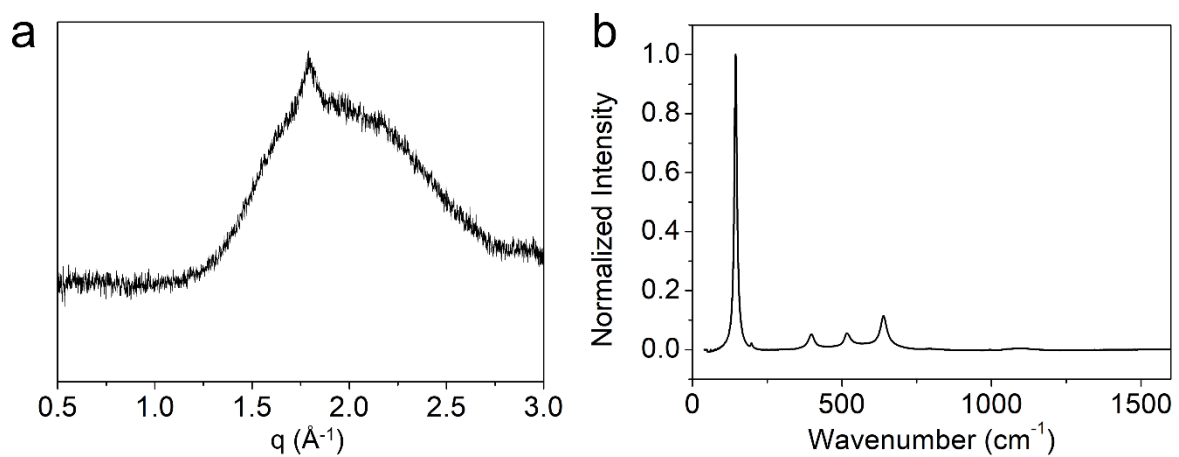

**Figure S1.** a) XRD pattern of a  $\text{TiO}_2$  colloidal monolayer. The sharp peak at  $1.79 \text{\AA}^{-1}$  corresponds to the 101 reflection of anatase  $\text{TiO}_2$ .<sup>1</sup> The broad peak is associated with diffuse scattering from the underlying glass substrate.<sup>2</sup> b) Raman spectrum of a  $\text{TiO}_2$  colloidal monolayer. Peaks at 144, 400, 515, 641  $\text{cm}^{-1}$  match the anatase phase.<sup>1</sup>

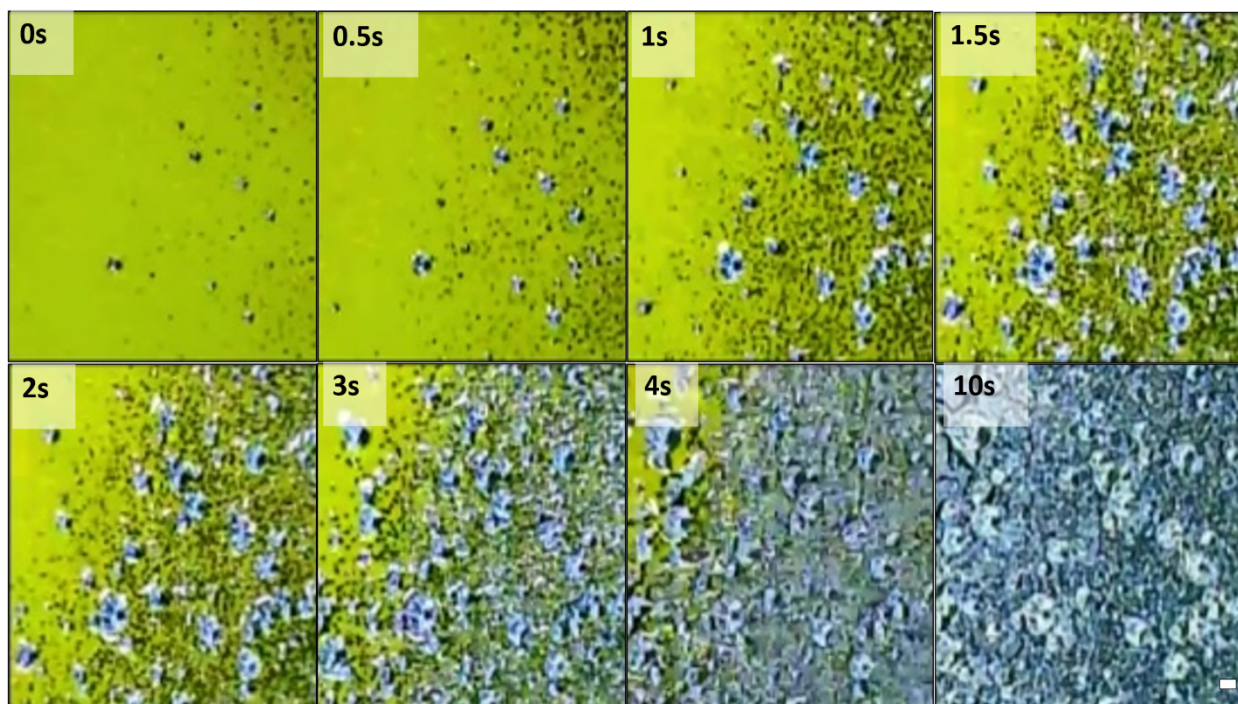

**Figure S2.** *In situ* optical micrographs of a  $\text{FA}_{0.5}\text{MA}_{0.5}\text{PbI}_3$  film drying. Solution appears as green-yellow while crystals acquire a blue color.  $t = 0$  s corresponds to the time at which crystal nuclei were first observed. Flower stem growth was observed first. Subsequently, flower petals began to crystallize starting as early as  $t = 0.5$  s. At later times, a continuous perovskite film crystallized around the flowers, with crystallization completing around  $t = 10$  s. Scale bar = 100  $\mu\text{m}$ .

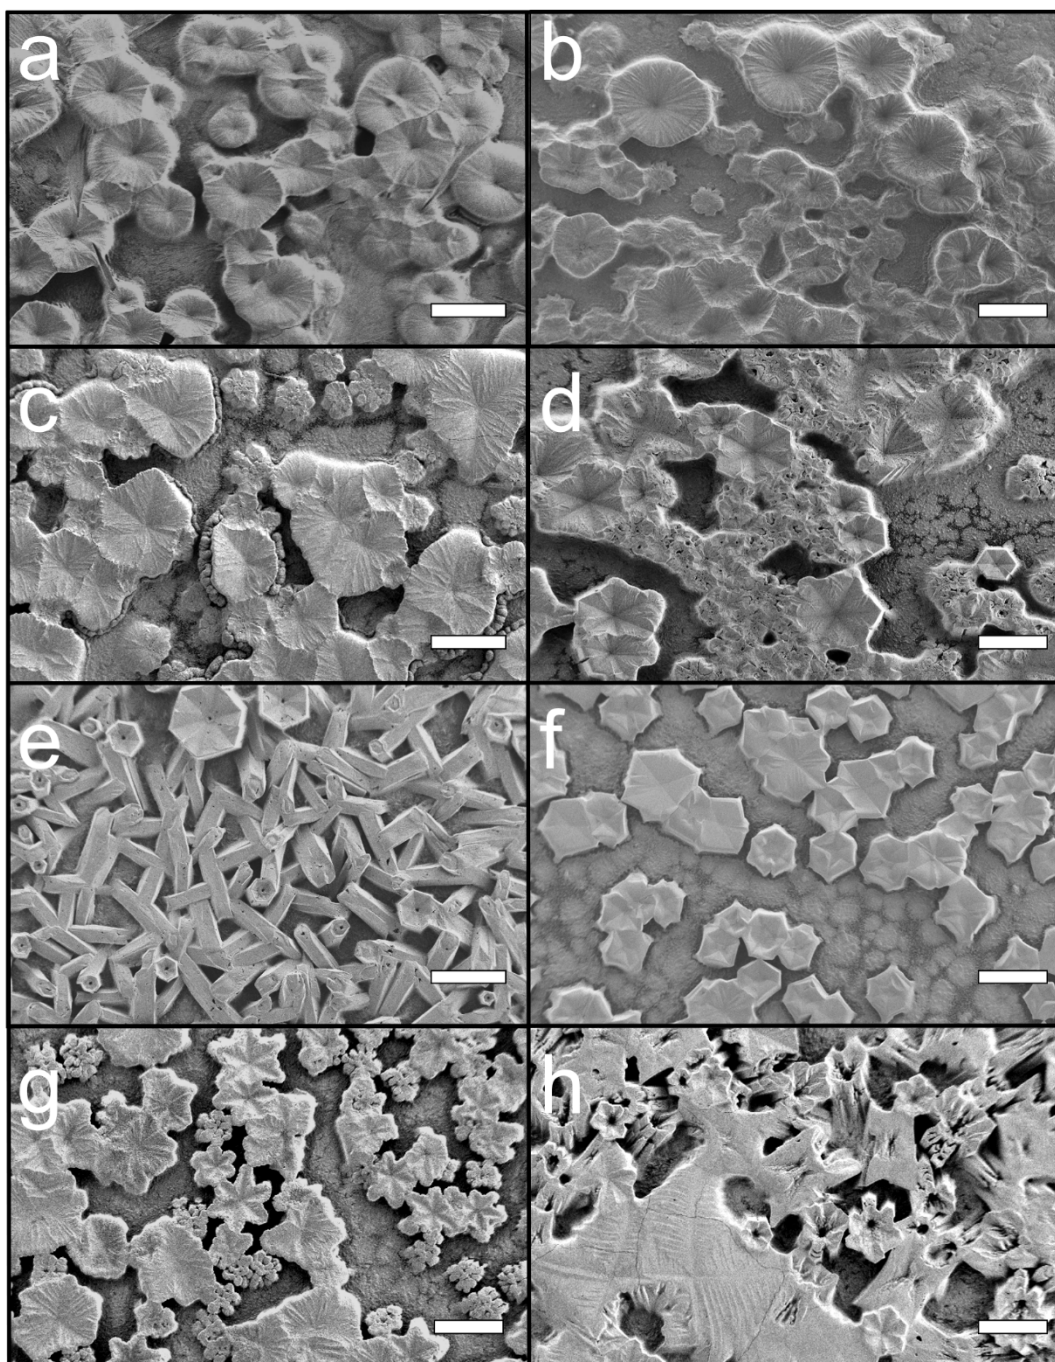

**Figure S3.** Low magnification SEM images of a)  $\text{MAPbI}_3$ ; b)  $\text{FA}_{0.5}\text{MA}_{0.5}\text{PbI}_3$ ; c)  $\text{FA}_{0.75}\text{MA}_{0.25}\text{PbI}_3$ ; d)  $\text{FA}_{0.8}\text{MA}_{0.2}\text{PbI}_3$ ; e)  $\text{FAPbI}_3$ ; f)  $\text{MAPb}_{0.8}\text{I}_{2.6}$ ; g)  $\text{FA}_{0.75}\text{MA}_{0.25}\text{Pb}_{0.8}\text{I}_{2.6}$ ; h)  $\text{FAPb}_{0.8}\text{I}_{2.6}$  crystals. Scale bar = 100  $\mu\text{m}$ .

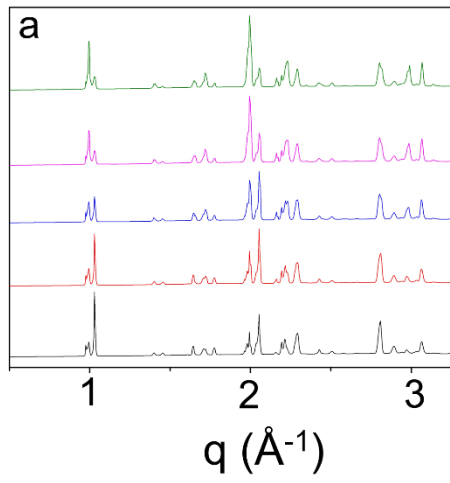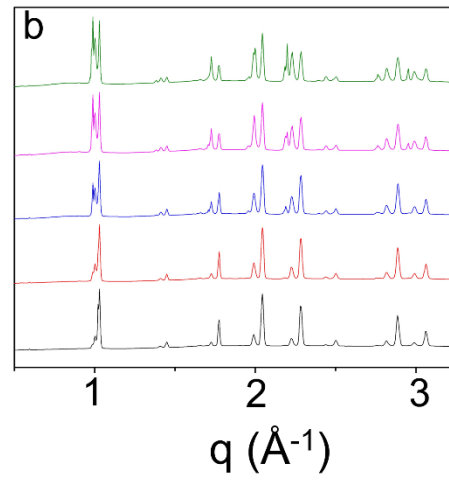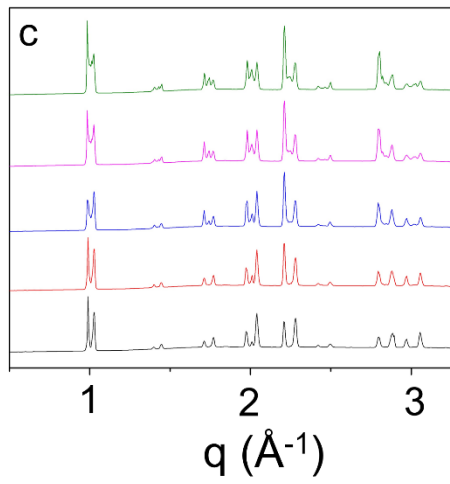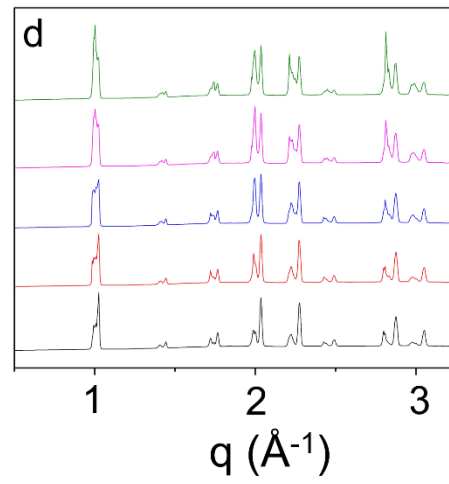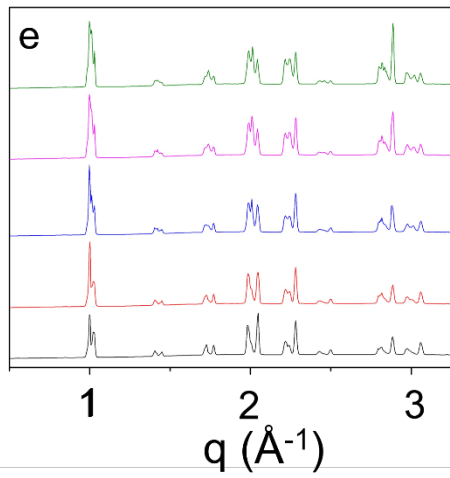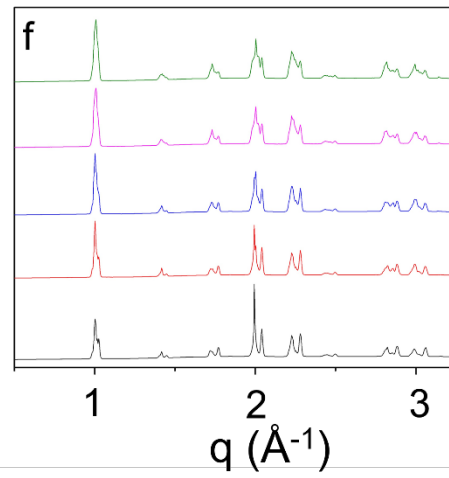

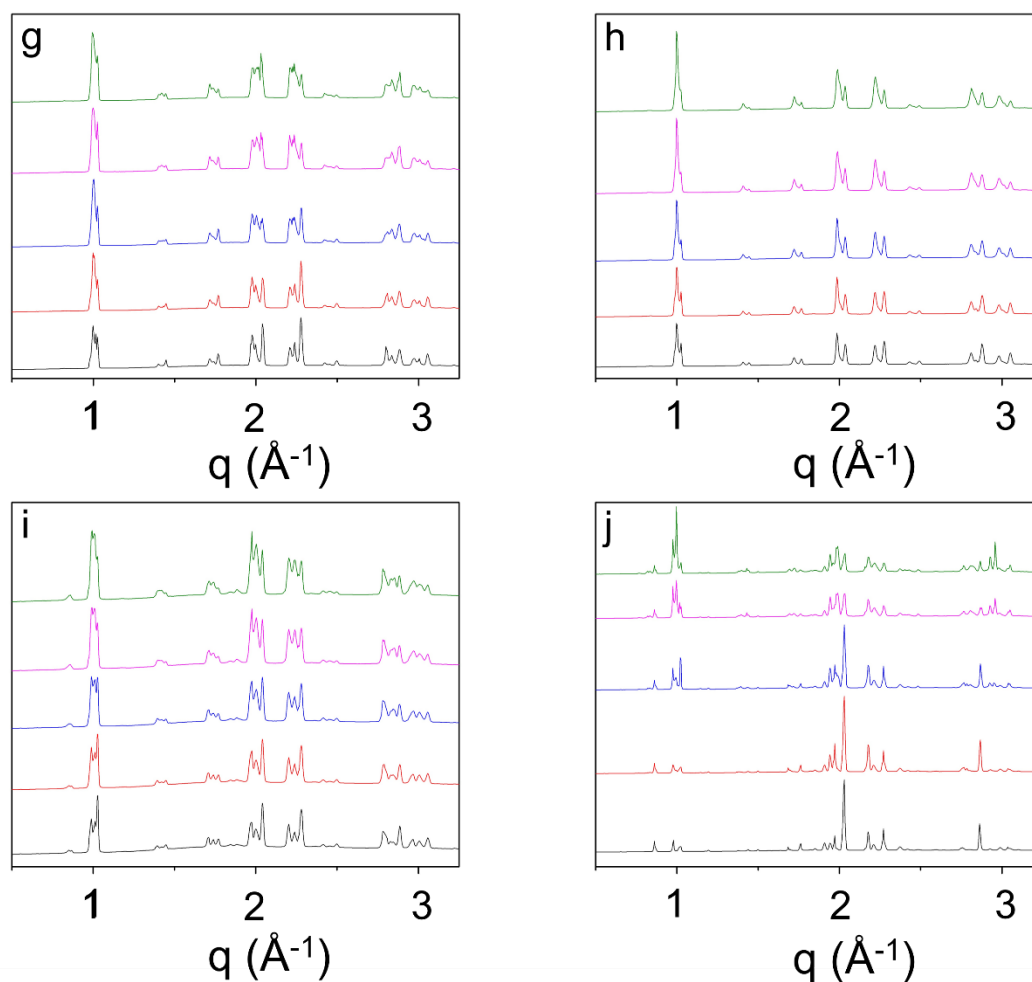

**Figure S4.** GIWAXS diffraction patterns at different incident angles for the following perovskite compositions: a) MAPbI<sub>3</sub>, b) FA<sub>0.2</sub>MA<sub>0.8</sub>PbI<sub>3</sub>, c) FA<sub>0.4</sub>MA<sub>0.6</sub>PbI<sub>3</sub>, d) FA<sub>0.5</sub>MA<sub>0.5</sub>PbI<sub>3</sub>, e) FA<sub>0.6</sub>MA<sub>0.4</sub>PbI<sub>3</sub>, f) FA<sub>0.65</sub>MA<sub>0.35</sub>PbI<sub>3</sub>, g) FA<sub>0.7</sub>MA<sub>0.3</sub>PbI<sub>3</sub>, h) FA<sub>0.75</sub>MA<sub>0.25</sub>PbI<sub>3</sub>, i) FA<sub>0.8</sub>MA<sub>0.2</sub>PbI<sub>3</sub>, and j) FAPbI<sub>3</sub>. Diffraction patterns were collected at incident angles of 0.100° (green), 0.120° (magenta), 0.150° (blue), 0.200° (red), 0.250° (black).

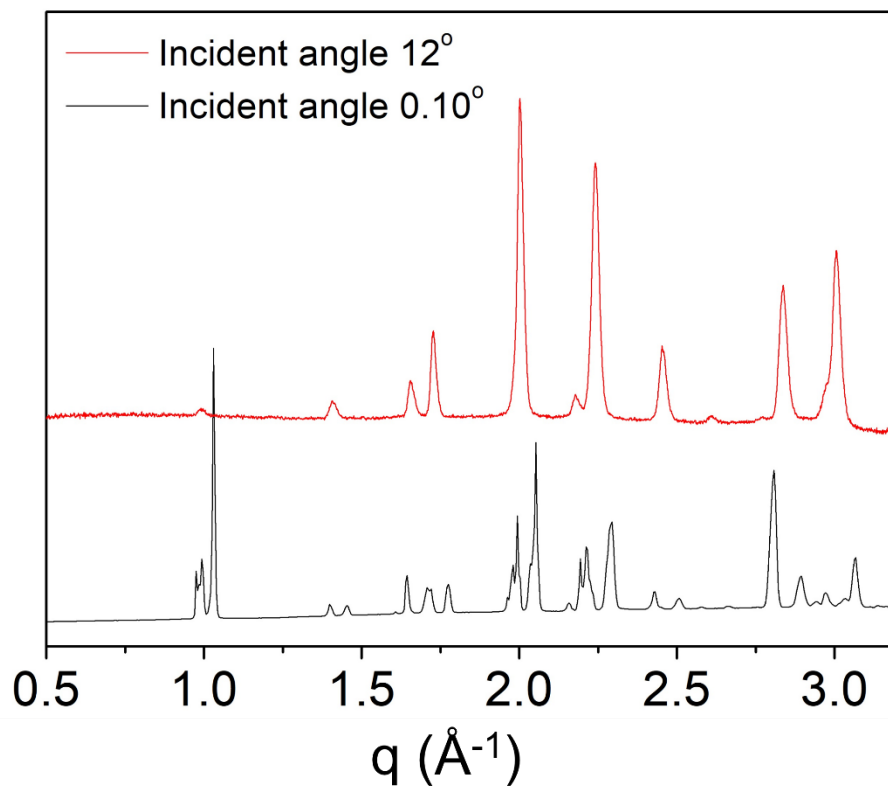

**Figure S5.** Comparison of XRD patterns collected on a MAPbI<sub>3</sub> flower at incident angles of  $0.10^\circ$  and  $12^\circ$ .

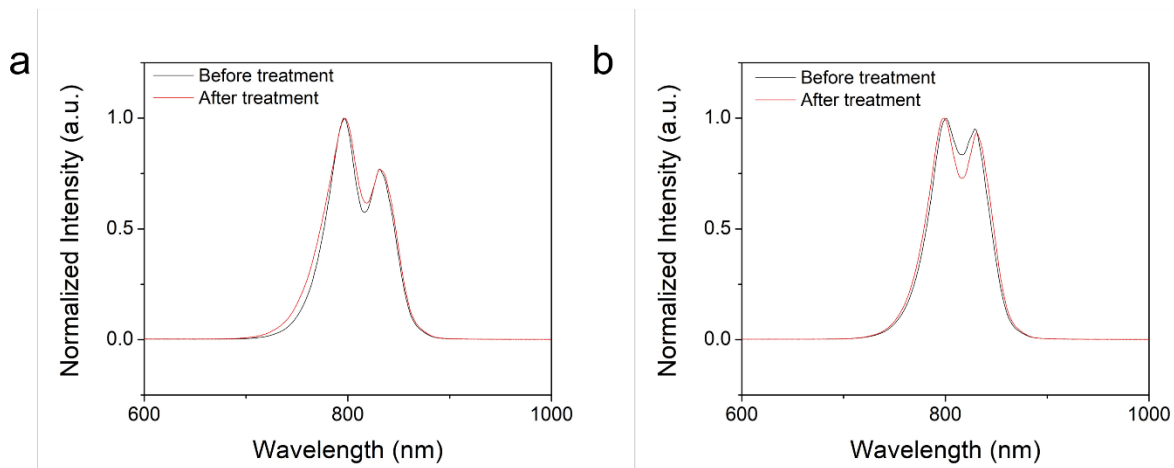

**Figure S6.** PL spectra ( $\lambda_{\text{ex}} = 546 \text{ nm}$ ) of  $\text{FA}_{0.75}\text{MA}_{0.25}\text{PbI}_3$  flowers after surface passivation with a) thiophene and b) 10 wt% benzothiadiazole dissolved in dichlorobenzene.<sup>3</sup> Passivation was performed by drop casting thiophene and benzothiadiazole/dichlorobenzene solutions onto perovskite films and allowing the solutions to sit for 10 min. Excess solution was subsequently removed by spin coating the samples at 2000 rpm. After spin coating, some residual solution remained.



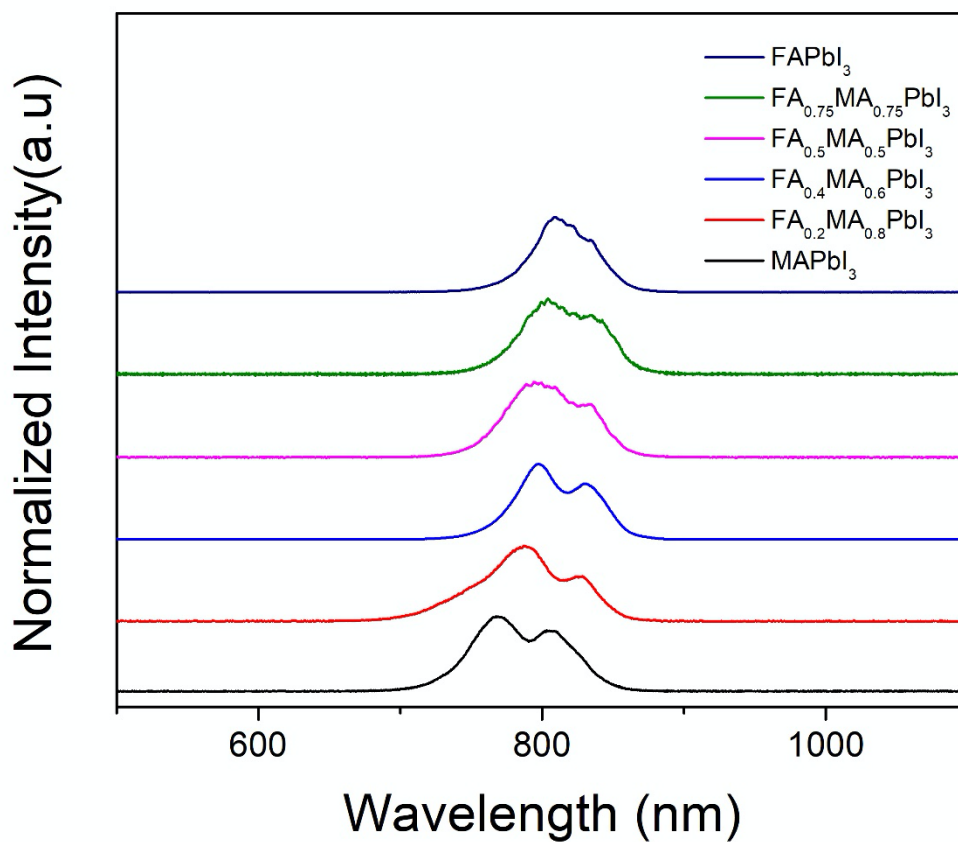

**Figure S7.** PL spectra of perovskite flower films ( $\lambda_{\text{ex}} = 546 \text{ nm}$ ) collected with a  $73 \mu\text{m}^2$  aperture to capture an entire flower for the following compositions: MAPbI<sub>3</sub>, FA<sub>0.2</sub>MA<sub>0.8</sub>PbI<sub>3</sub>, FA<sub>0.4</sub>MA<sub>0.6</sub>PbI<sub>3</sub>, FA<sub>0.5</sub>MA<sub>0.5</sub>PbI<sub>3</sub>, FA<sub>0.75</sub>MA<sub>0.25</sub>PbI<sub>3</sub>, and FAPbI<sub>3</sub>.

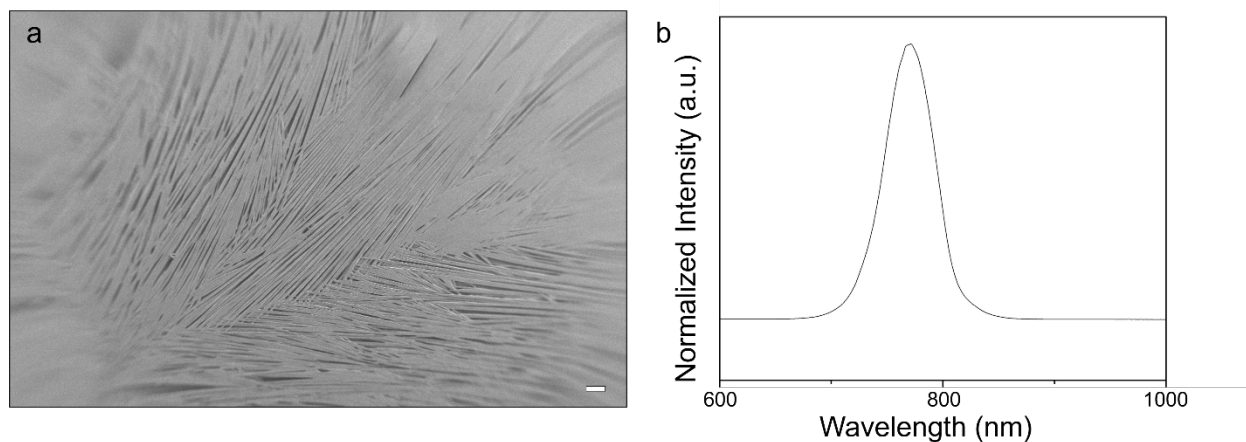

**Figure S8.** a) MAPbI<sub>3</sub> needle crystals formed by drop casting a precursor solution onto a TiO<sub>2</sub> colloidal monolayer at 20 °C. Scale bar = 100 μm. b) PL spectrum collected on the film ( $\lambda_{\text{ex}} = 546$  nm).

## References

1. S. S. El-Deen, A. M. Hashem, A. E. A. Ghany, S. Indris, H. Ehrenberg, A. Mauger and C. M. Julien, *Ionics*, 2018, **24**, 2925.
2. R. J. Amjad, M. R. Sahar, S. K. Ghoshal, M. R. Dousti, S. Riaz, A. R. Samavati, M. N. A. Jamaludin and S. Naseem, *Chinese Phys Lett*, 2013, **30**.
3. K. Schotz, A. M. Askar, W. Peng, D. Seeberger, T. P. Gujar, M. Thelakkat, A. Kohler, S. Huettner, O. M. Bakr, K. Shankar and F. Panzer, *J Mater Chem C*, 2020, **8**, 2289.
